# Supplementary material
Source: PubMed Central journal article supplement (PMC1859959)
Supplement: pnas_0604673103_7.pdf [file pnas_0604673103_7.pdf]

**Table 1. Total visually responsive sites tested in GFS**

| Monkey     | <i>V1</i> | <i>V2</i> | <i>V4</i> |
|------------|-----------|-----------|-----------|
| <i>E00</i> | 47        | 45        | 73        |
| <i>K97</i> | -         | -         | 39        |
| <i>D03</i> | 31        | 13        | -         |
| Total      | 78        | 58        | 112       |
