# Supplementary material
Source: PubMed Central journal article supplement (PMC1859959)

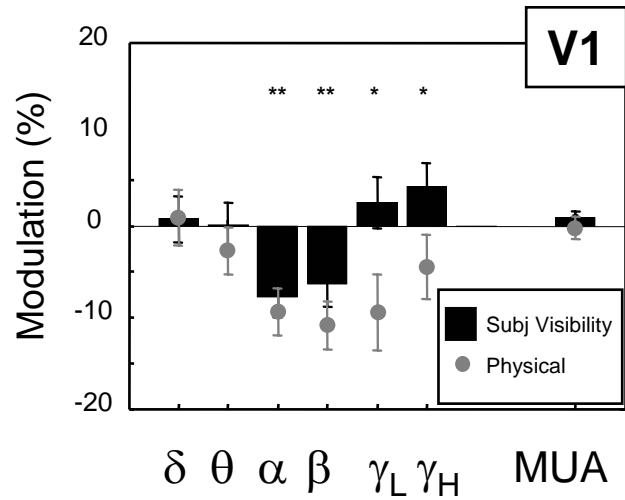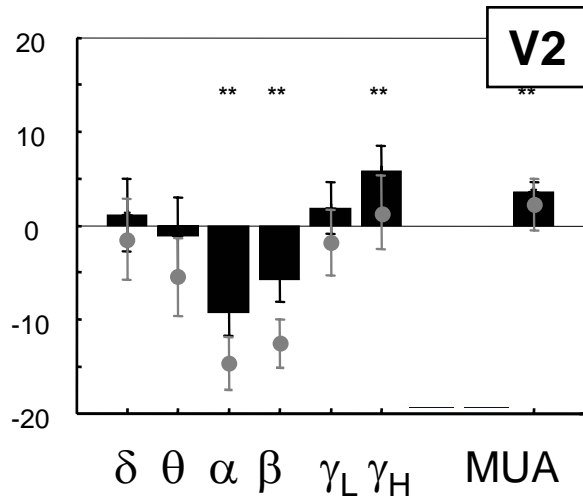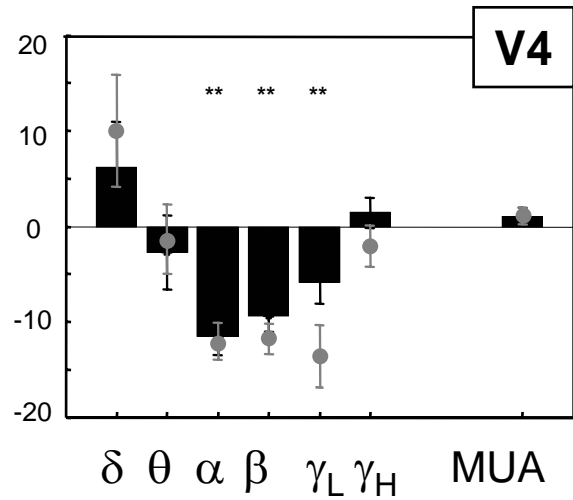

Frequency Range

Supplement: pnas_0604673103_1.pdf [file pnas_0604673103_1.pdf]

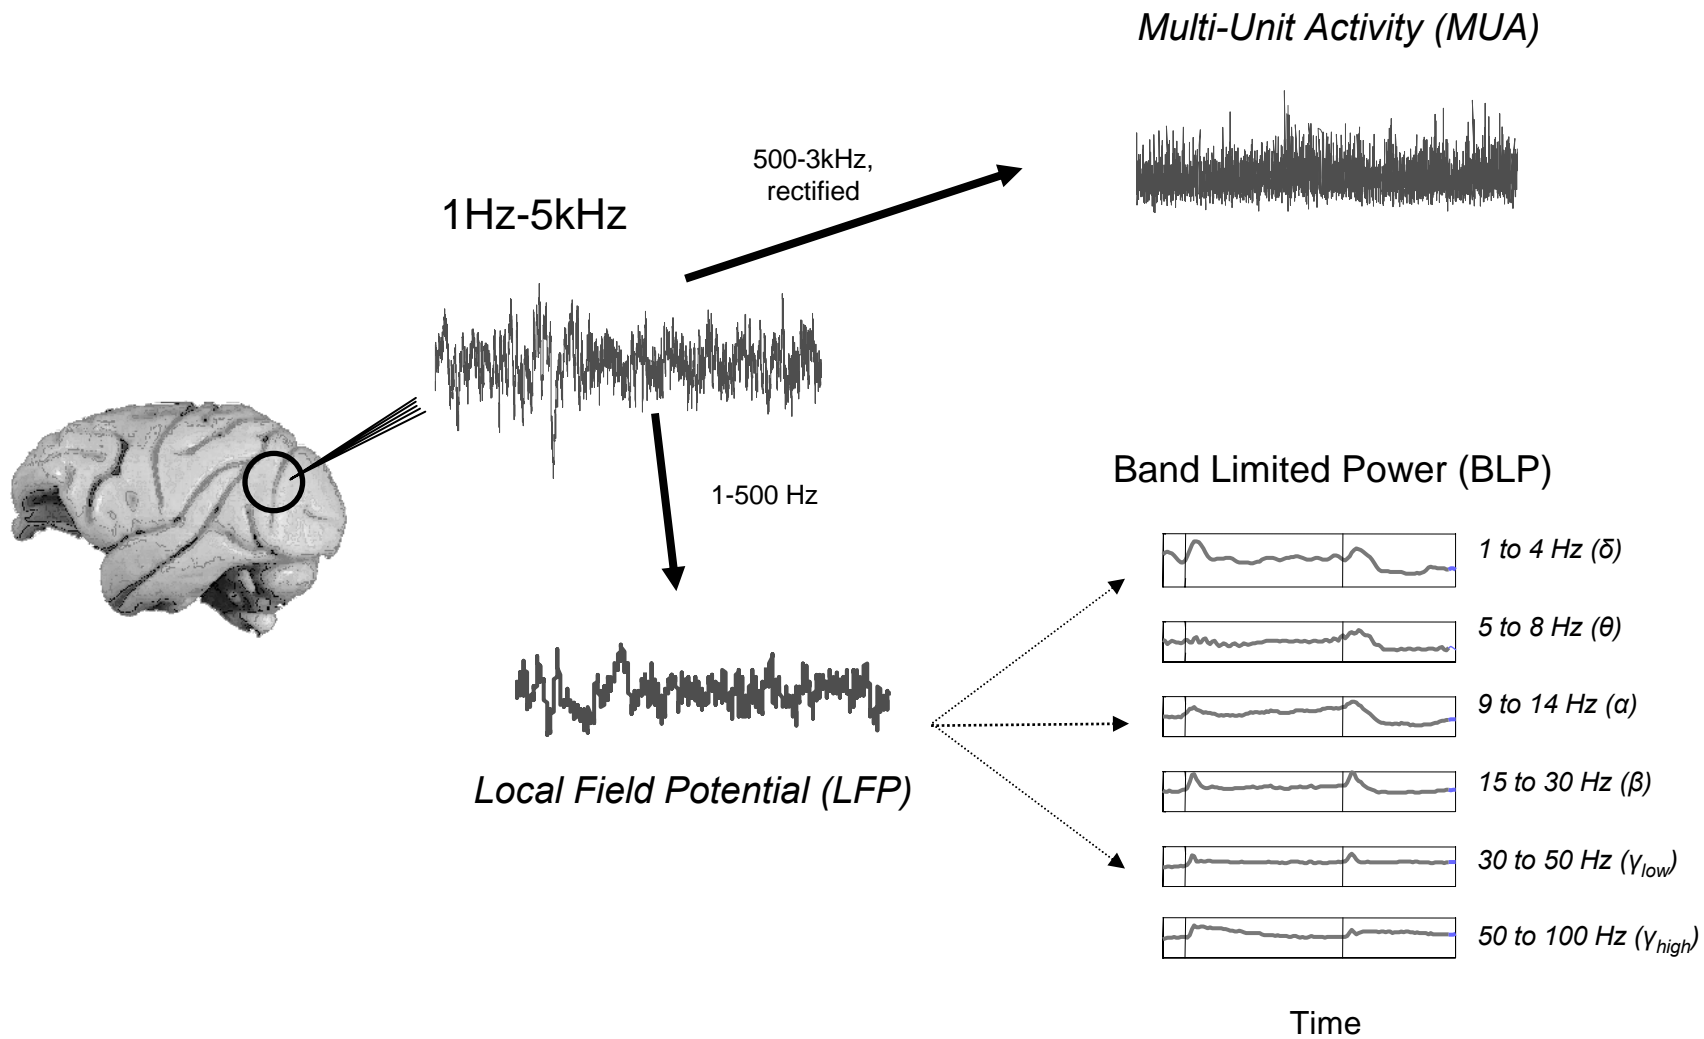

Supplement: pnas_0604673103_2.pdf [file pnas_0604673103_2.pdf]

### Area V1

### Area V2

### Area V4

MUA

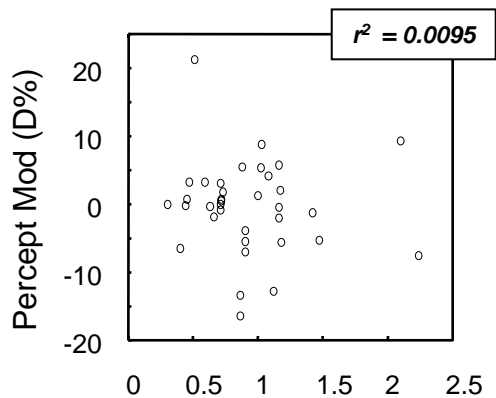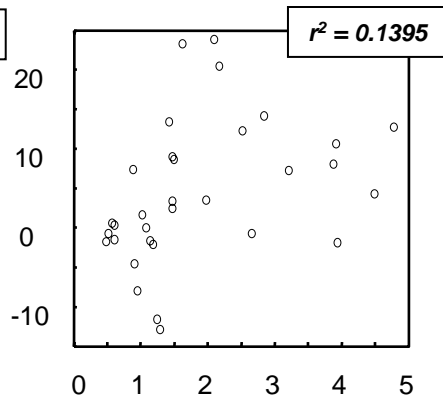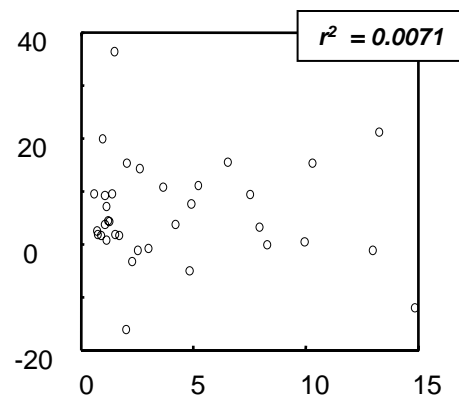

Receptive Field Area (deg<sup>2</sup>)

GAMMA  
(30-50 Hz)

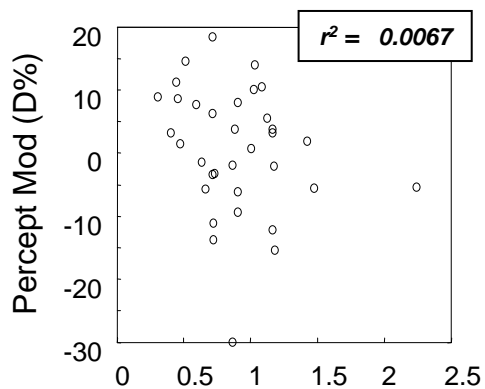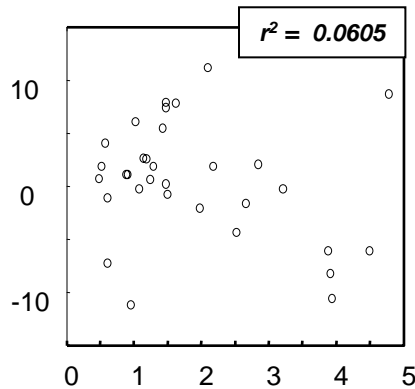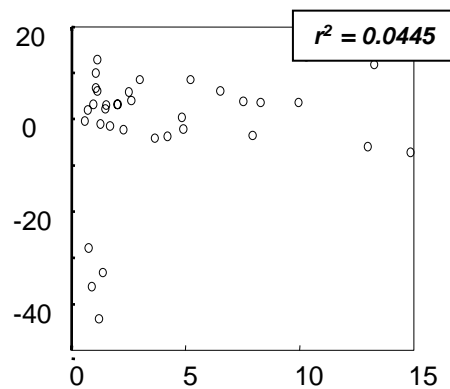

Receptive Field Area (deg<sup>2</sup>)

Supplement: pnas_0604673103_3.pdf [file pnas_0604673103_3.pdf]

# A

## LFP Alpha Power (9-14 Hz)

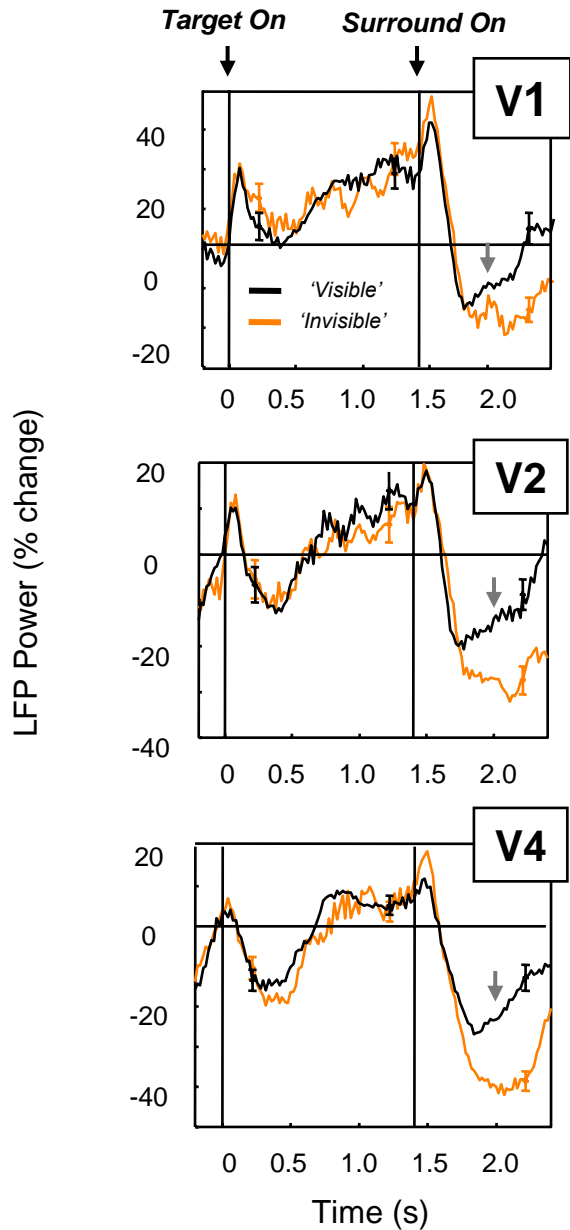

# B

## LFP Gamma Power (30-50 Hz)

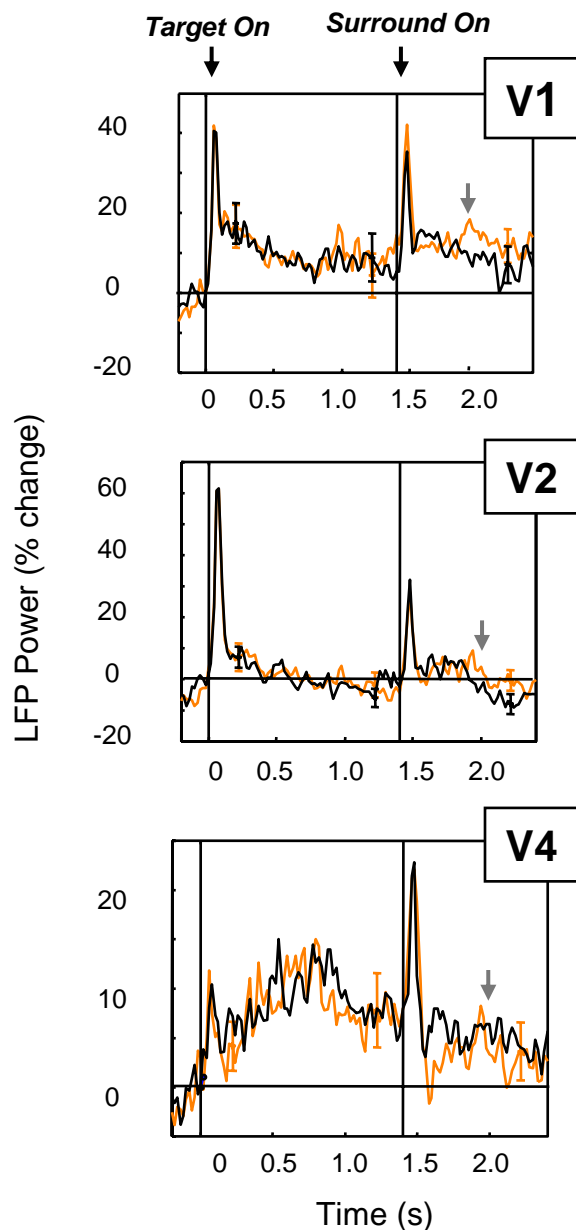

Supplement: pnas_0604673103_4.pdf [file pnas_0604673103_4.pdf]

**LFP Alpha Power (9-14 Hz)**

**LFP Gamma Power (30-50 Hz)**

**MUA Power (500Hz-3kHz)**

**V1**

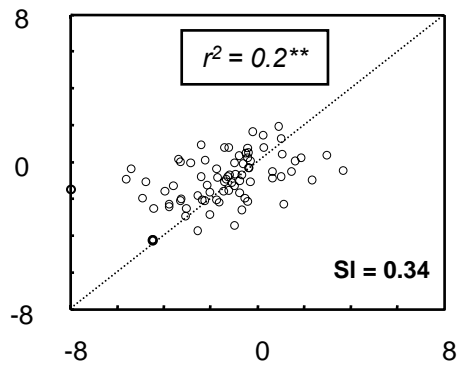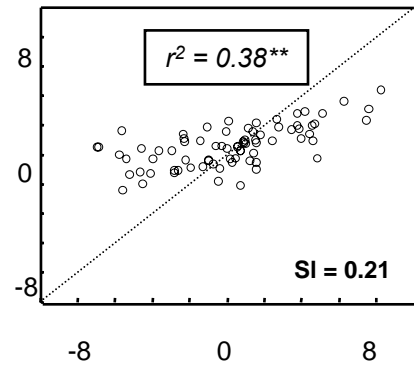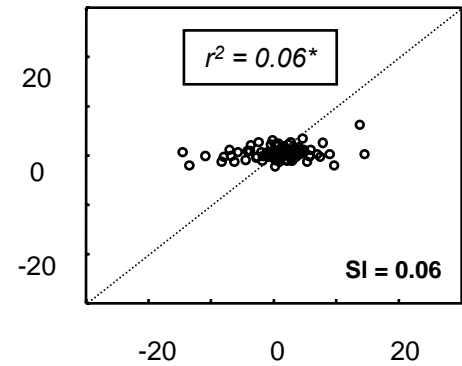

**V2**

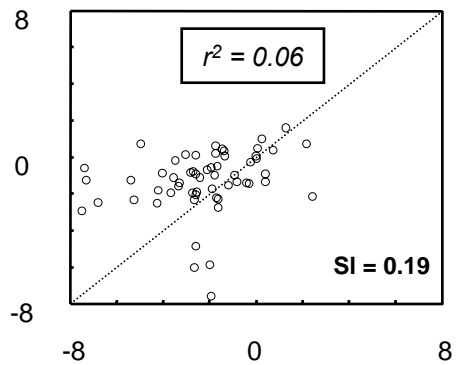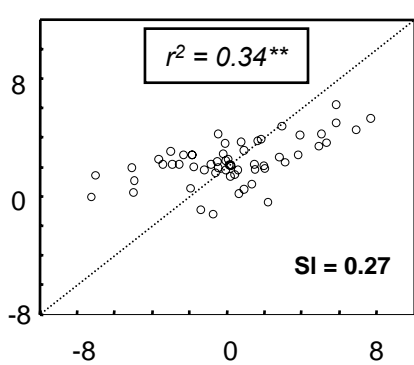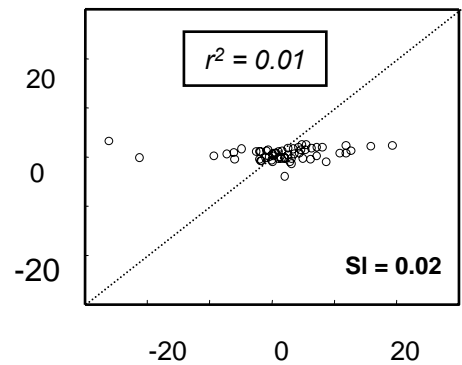

**V4**

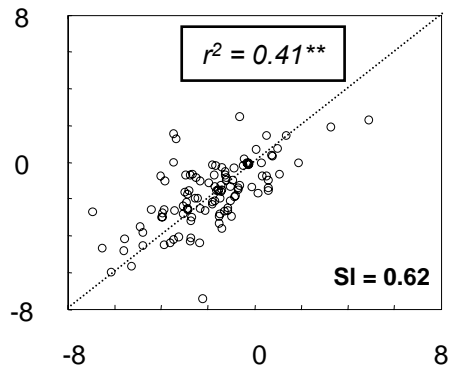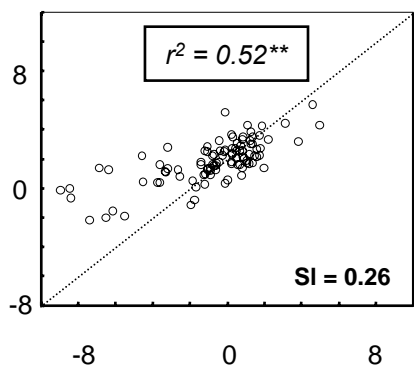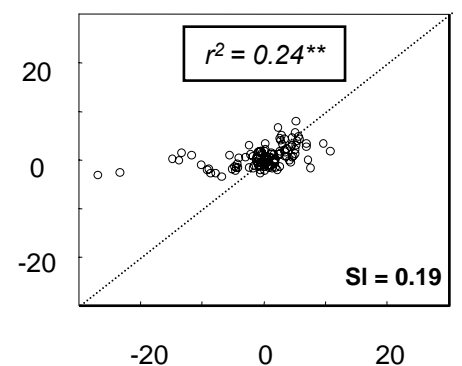

Phys Mod (t-values)

Percept Mod (t-values)

Supplement: pnas_0604673103_5.pdf [file pnas_0604673103_5.pdf]

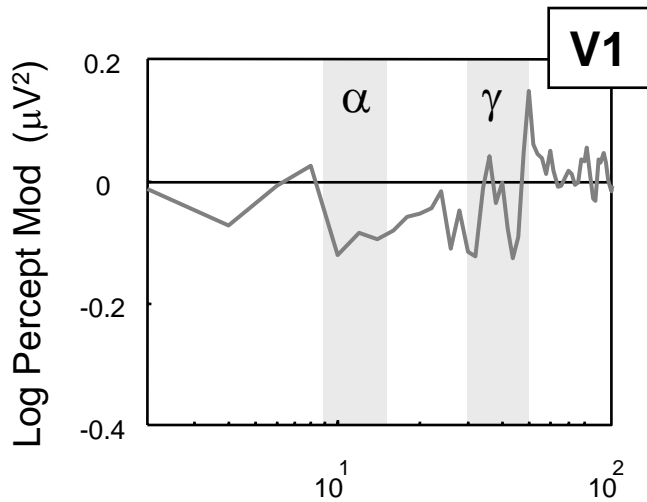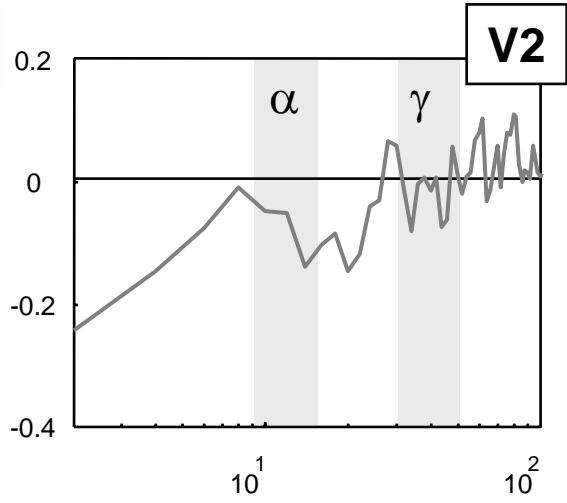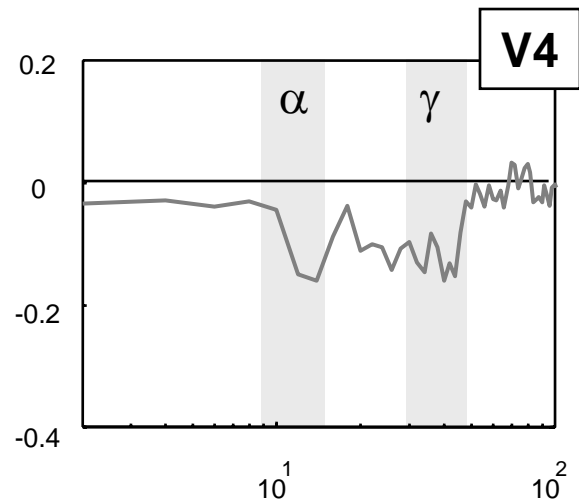

Supplement: pnas_0604673103_6.pdf [file pnas_0604673103_6.pdf]
